# Supplementary material
Source: Springer Nature journal article supplement (https://www.springermedizin.de/resource/supplementary/12935_2009_233_MOESM5_ESM.pdf/9540158)

S100P

RAB25

MRC-9

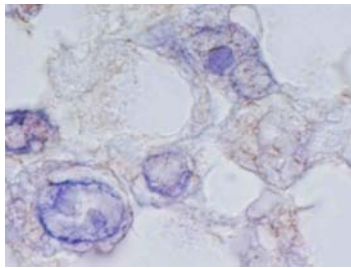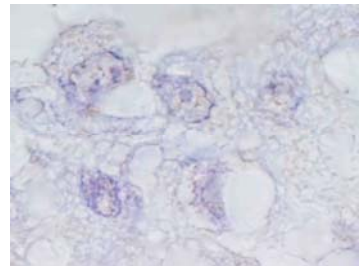

A549

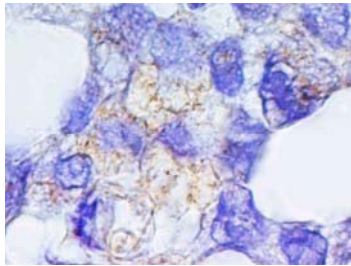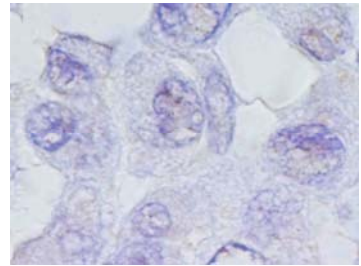

EBC-1

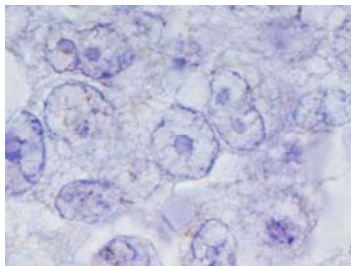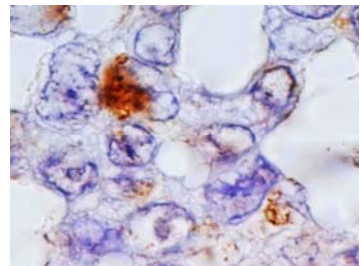

LU65

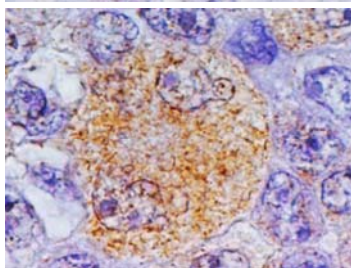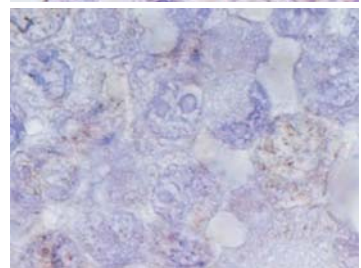

STC1

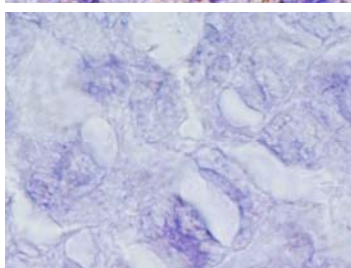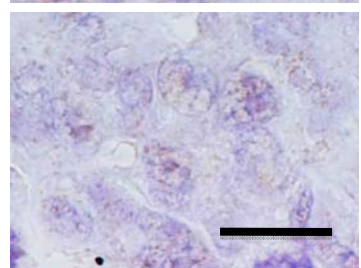

Supplement: MOESM5 [file 9540158]
